# Supplementary material for: Comparative Postembryonic Skeletal Ontogeny in Two Sister Lineages of Old World Tree Frogs (Rhacophoridae: Taruga, Polypedates)
Source: PLoS One. 2017 Jan 6;12(1):e0167939. doi: 10.1371/journal.pone.0167939 (PMC5218391; doi:10.1371/journal.pone.0167939)
Supplement: S6 Table — (XLSX) [file pone.0167939.s006.xlsx]

## Sheet: Sheet1
	Taruga eques 2714	Taruga eques 2741	Taruga eques Agra TP	Taruga fastigo 2783	Taruga longinasus KAN1	Taruga longinasus Kithulgala TP	Polypedates cruciger KURU3	Polypedates cruciger peradeniya TP	Polypedates cruciger 2640	Polypedates maculatus KANT	Polypedates maculatus Kurunegala TP	Polypedates leucomystax 253029	Polypedates colletti 242765	Polypedates macrotis 239119	Polypedates otilophus 239147	Polypedates leucomystax 253086	Polypedates leucomystax 255296	Polypedates leucomystax 256451	Polypedates leucomystax 1.1.5269	Rhacophorus anamensis 253934	Rhacophorus bipunctatus 253114	Rhacophorus calcaneus 256465	Rhacophorus chenfui 232964	Rhacophorus dulitensis 235741	Rhacophorus gauni 235047	Rhacophorus malabaricus	Rhacophorus nigropalmatus 230902	Rhacophorus pardalis 231366	Rhacophorus reinwardtii 1.1.5273	Rhacophorus reinwardtii 235034	Rhacophorus sp. 255280	Ghatixalus variabilis	Ghatixalus variabilis sp	Mantella aurantiaca	Mantella madagascariensis	Mantella sp	Mantidactylus grandidieri
Taruga eques 2714
Taruga eques 2741	0
Taruga eques Agra TP	0.00112045	0
Taruga fastigo 2783	0.0230769	0.0230769	0.0230769
Taruga longinasus KAN1	0.0480769	0.0480769	0.0480769	0.0423077
Taruga longinasus Kithulgala TP	0.0480769	0.0480769	0.0480769	0.0423077	0
Polypedates cruciger KURU3	0.11401	0.11401	0.11401	0.121858	0.133452	0.133452
Polypedates cruciger peradeniya TP	0.115971	0.115971	0.115971	0.123818	0.135412	0.135412	0.00192308
Polypedates cruciger 2640	0.111861	0.111861	0.111861	0.119655	0.131222	0.131222	0.00577087	0.00769025
Polypedates maculatus KANT	0.125458	0.125458	0.125458	0.127473	0.144846	0.144846	0.057696	0.0596154	0.0614203
Polypedates maculatus Kurunegala TP	0.125458	0.125458	0.125458	0.127473	0.144846	0.144846	0.057696	0.0596154	0.0614203	0
Polypedates leucomystax 253029	0.131243	0.131243	0.131243	0.131308	0.148723	0.148723	0.0674551	0.0655214	0.071208	0.0732956	0.0732956
Polypedates colletti 242765	0.123605	0.123605	0.123605	0.133318	0.137229	0.137229	0.0869092	0.0849763	0.0828497	0.0770848	0.0770848	0.0963391
Polypedates macrotis 239119	0.13522	0.13522	0.13522	0.135282	0.148829	0.148829	0.0714232	0.0694899	0.0751413	0.0771552	0.0771552	0.0674374	0.105973
Polypedates otilophus 239147	0.121478	0.121478	0.121478	0.127275	0.148489	0.148489	0.121401	0.123322	0.115396	0.0981586	0.0981586	0.125201	0.10985	0.111689
Polypedates leucomystax 253086	0.135399	0.135399	0.135399	0.133491	0.145271	0.145271	0.0792786	0.0773455	0.0810702	0.0811057	0.0811057	0.0598436	0.0985098	0.0849086	0.125304
Polypedates leucomystax 255296	0.131517	0.131517	0.131517	0.12961	0.141389	0.141389	0.0811865	0.0792534	0.0829896	0.08304	0.08304	0.05599	0.0985098	0.0829818	0.125304	0.003861
Polypedates leucomystax 256451	0.135123	0.135123	0.135123	0.135187	0.156472	0.156472	0.0790549	0.0771215	0.0827934	0.0809985	0.0809985	0.0154143	0.102119	0.0674374	0.130953	0.0656247	0.0636979
Polypedates leucomystax 1.1.5269	0.121731	0.121731	0.121731	0.117852	0.137399	0.137399	0.0812094	0.0792763	0.0829896	0.0849894	0.0849894	0.0579294	0.0946318	0.0848956	0.121457	0.034749	0.030888	0.0714177
Rhacophorus anamensis 253934	0.146697	0.146697	0.146697	0.146683	0.156308	0.156308	0.146814	0.144891	0.146512	0.134925	0.134925	0.150922	0.139303	0.141357	0.148664	0.145554	0.145566	0.15094	0.145517
Rhacophorus bipunctatus 253114	0.127695	0.127695	0.127695	0.129597	0.145041	0.145041	0.143278	0.141353	0.14296	0.141009	0.141009	0.149119	0.145312	0.143423	0.131773	0.147539	0.147536	0.147201	0.137804	0.0885421
Rhacophorus calcaneus 256465	0.13344	0.13344	0.13344	0.133384	0.150791	0.150791	0.151029	0.149105	0.150727	0.152655	0.152655	0.162561	0.162569	0.156863	0.16054	0.172505	0.17057	0.166429	0.168631	0.0943373	0.10612
Rhacophorus chenfui 232964	0.143313	0.143313	0.143313	0.147181	0.151053	0.151053	0.145497	0.143565	0.143218	0.152874	0.152874	0.149633	0.147497	0.143868	0.141361	0.153797	0.153833	0.155443	0.151718	0.0980996	0.117819	0.113842
Rhacophorus dulitensis 235741	0.158269	0.158269	0.158269	0.16204	0.173678	0.173678	0.166223	0.164285	0.16593	0.16008	0.16008	0.172494	0.168486	0.158924	0.164209	0.174615	0.174627	0.172473	0.16688	0.105566	0.111509	0.119421	0.129002
Rhacophorus gauni 235047	0.12377	0.12377	0.12377	0.125695	0.143059	0.143059	0.133378	0.131454	0.131165	0.14471	0.14471	0.147468	0.147276	0.139534	0.139218	0.155409	0.153482	0.147439	0.147664	0.125074	0.104117	0.0980849	0.0980529	0.132817
Rhacophorus malabaricus	0.139045	0.139045	0.139045	0.142852	0.160228	0.160228	0.154754	0.156682	0.150564	0.154367	0.154367	0.158654	0.168438	0.16464	0.148722	0.161123	0.159178	0.166398	0.151383	0.103616	0.10768	0.103871	0.124869	0.120941	0.124804
Rhacophorus nigropalmatus 230902	0.145105	0.145105	0.145105	0.143105	0.147094	0.147094	0.135567	0.133644	0.133325	0.139216	0.139216	0.149127	0.145345	0.13573	0.137267	0.134029	0.134027	0.14913	0.139855	0.0866273	0.100378	0.105817	0.100073	0.119254	0.126812	0.111291
Rhacophorus pardalis 231366	0.158285	0.158285	0.158285	0.162056	0.173695	0.173695	0.166237	0.1643	0.165942	0.163945	0.163945	0.176369	0.168496	0.156985	0.164223	0.178508	0.178519	0.176349	0.170772	0.105566	0.111508	0.119432	0.129011	0.00383877	0.132827	0.120953	0.119255
Rhacophorus reinwardtii 1.1.5273	0.121711	0.121711	0.121711	0.121687	0.135239	0.135239	0.158493	0.15657	0.158197	0.156234	0.156234	0.160593	0.160648	0.162601	0.15265	0.157112	0.155165	0.160599	0.153177	0.0863724	0.0578195	0.0962964	0.113555	0.122841	0.11539	0.105556	0.0961611	0.119002
Rhacophorus reinwardtii 235034	0.127357	0.127357	0.127357	0.123515	0.142793	0.142793	0.14477	0.142846	0.144473	0.144409	0.144409	0.146934	0.15274	0.15084	0.146697	0.149203	0.149225	0.148835	0.143371	0.0845672	0.0520844	0.0925082	0.100155	0.117134	0.0923775	0.0960007	0.0982202	0.117134	0.0480226
Rhacophorus sp. 255280	0.141151	0.141151	0.141151	0.141096	0.154617	0.154617	0.152978	0.15104	0.15655	0.154579	0.154579	0.156976	0.168444	0.151154	0.164461	0.170804	0.166955	0.160827	0.163045	0.100133	0.108056	0.0326923	0.108105	0.117488	0.0962768	0.101944	0.111612	0.117499	0.10397	0.0905832
Ghatixalus variabilis	0.123337	0.123337	0.123337	0.117506	0.129027	0.129027	0.152068	0.153981	0.146006	0.153656	0.153656	0.156173	0.162175	0.154222	0.138617	0.173932	0.171994	0.156162	0.166168	0.132659	0.125107	0.130797	0.109601	0.155635	0.105587	0.128551	0.136333	0.155648	0.122944	0.123023	0.132747
Ghatixalus variabilis sp	0.113934	0.113934	0.113934	0.108071	0.119638	0.119638	0.14291	0.144842	0.136804	0.144532	0.144532	0.146879	0.151015	0.145083	0.129343	0.164796	0.162838	0.146915	0.156978	0.123516	0.115934	0.121629	0.0982403	0.146518	0.0943558	0.119399	0.127203	0.146528	0.113748	0.113911	0.123566	0.00965253
Mantella aurantiaca	0.175934	0.175934	0.175934	0.173995	0.183662	0.183662	0.179835	0.181783	0.177509	0.194872	0.194872	0.191201	0.191445	0.185578	0.181625	0.19578	0.19577	0.195084	0.189927	0.162316	0.152862	0.166483	0.166701	0.179626	0.154845	0.160422	0.181966	0.177689	0.156457	0.150417	0.166535	0.177091	0.166155
Mantella madagascariensis	0.177914	0.177914	0.177914	0.175976	0.181797	0.181797	0.177724	0.179672	0.179463	0.194914	0.194914	0.189289	0.193373	0.187507	0.185526	0.19576	0.197688	0.198951	0.195728	0.164217	0.158585	0.170358	0.168597	0.185389	0.162576	0.160393	0.191623	0.183452	0.156438	0.152315	0.168472	0.179005	0.168072	0.0153257
Mantella sp	0.174874	0.174874	0.174874	0.174832	0.182675	0.182675	0.174733	0.176719	0.172371	0.186256	0.186256	0.184455	0.192397	0.178555	0.174551	0.187015	0.185047	0.192268	0.186999	0.161463	0.155655	0.163192	0.159672	0.180936	0.147466	0.155369	0.181248	0.178936	0.151325	0.153078	0.163339	0.17012	0.159042	0.00975131	0.0194637
Mantidactylus grandidieri	0.175798	0.175798	0.175798	0.168159	0.183547	0.183547	0.183849	0.181899	0.187257	0.192991	0.192991	0.199155	0.191453	0.191435	0.189351	0.19001	0.188076	0.204952	0.191955	0.166033	0.156746	0.160561	0.183917	0.183343	0.152822	0.177759	0.191551	0.181396	0.158282	0.157981	0.168309	0.199652	0.1907	0.107368	0.111206	0.101325	0
