# Supplementary material for: Comparative Postembryonic Skeletal Ontogeny in Two Sister Lineages of Old World Tree Frogs (Rhacophoridae: Taruga, Polypedates)
Source: PLoS One. 2017 Jan 6;12(1):e0167939. doi: 10.1371/journal.pone.0167939 (PMC5218391; doi:10.1371/journal.pone.0167939)
Supplement: S8 Table — (XLSX) [file pone.0167939.s008.xlsx]

## Sheet: Sheet1
Axial	25	26	27	28	29	30	31	32	33	34	35	36	37	38	39	40	41	42	43	44	45	46
Neural arch 1
P.maculatus			1	1	1	1	1	1	1	1	1	1	1	1	1	1	1	1	1	1	1	1
P.cruciger			1	1	1	1	1	1	1	1	1	1	1	1	1	1	1	1	1	1	1	1
T.eques			1	1	1	1	1	1	1	1	1	1	1	1	1	1	1	1	1	1	1	1
T.longinasus					1		1	1	1	1	1	1	1	1	1	1	1	1	1	1	1	1
Neural arch 2
P.maculatus			1
P.cruciger			1	1	1	1	1	1	1	1	1	1	1	1	1	1	1	1	1	1	1	1
T.eques			1	1	1	1	1	1	1	1	1	1	1	1	1	1	1	1	1	1	1	1
T.longinasus					1		1	1	1	1	1	1	1	1	1	1	1	1	1	1	1	1
Neural arch 3
P.maculatus			1
P.cruciger			1	1	1	1	1	1	1	1	1	1	1	1	1	1	1	1	1	1	1	1
T.eques			1	1	1	1	1	1	1	1	1	1	1	1	1	1	1	1	1	1	1	1
T.longinasus					1		1	1	1	1	1	1	1	1	1	1	1	1	1	1	1	1
Neural arch 4
P.maculatus			1
P.cruciger			0	1	1	1	1	1	1	1	1	1	1	1	1	1	1	1	1	1	1	1
T.eques			1	1	1	1	1	1	1	1	1	1	1	1	1	1	1	1	1	1	1	1
T.longinasus						1	1	1	1	1	1	1	1	1	1	1	1	1	1	1	1	1
Neural arch 5
P.maculatus			1	1	1	1	1	1	1	1	1	1	1	1	1	1	1	1	1	1	1	1
P.cruciger			0	0	0	1	1	1	1	1	1	1	1	1	1	1	1	1	1	1	1	1
T.eques			1	1	1	1	1	1	1	1	1	1	1	1	1	1	1	1	1	1	1	1
T.longinasus							1	1	1	1	1	1	1	1	1	1	1	1	1	1	1	1
Neural arch 6
P.maculatus				1	1	1	1	1	1	1	1	1	1	1	1	1	1	1	1	1	1	1
P.cruciger			0	0	0	1	1	1	1	1	1	1	1	1	1	1	1	1	1	1	1	1
T.eques			1	1	1	1	1	1	1	1	1	1	1	1	1	1	1	1	1	1	1	1
T.longinasus										1	1	1	1	1	1	1	1	1	1	1	1	1
Neural arch 7
P.maculatus				1	1	1	1	1	1	1	1	1	1	1	1	1	1	1	1	1	1	1
P.cruciger			0	0	0	0	0	1	1	1	1	1	1	1	1	1	1	1	1	1	1	1
T.eques			1	1	1	1	1	1	1	1	1	1	1	1	1	1	1	1	1	1	1	1
T.longinasus											1	1	1	1	1	1	1	1	1	1	1	1
Neural arch 8					1	1	1	1	1	1	1	1	1	1	1	1	1	1	1	1	1	1
P.maculatus			0	0	0	0	0	0	0	1	1	1	1	1	1	1	1	1	1	1	1	1
P.cruciger			1	1	1	1	1	1	1	1	1	1	1	1	1	1	1	1	1	1	1	1
T.eques											1	1	1	1	1	1	1	1	1	1	1	1
T.longinasus
Centra1
P.maculatus					1	1	1	1	1	1	1	1	1	1	1	1	1	1	1	1	1	1
P.cruciger						1	1	1	1	1	1	1	1	1	1	1	1	1	1	1	1	1
T.eques			1	1	1	1	1	1	1	1	1	1	1	1	1	1	1	1	1	1	1	1
T.longinasus							1	1	1	1	1	1	1	1	1	1	1	1	1	1	1	1
Centra2
P.maculatus						1	1	1	1	1	1	1	1	1	1	1	1	1	1	1	1	1
P.cruciger						1	1	1	1	1	1	1	1	1	1	1	1	1	1	1	1	1
T.eques			1	1	1	1	1	1	1	1	1	1	1	1	1	1	1	1	1	1	1	1
T.longinasus							1	1	1	1	1	1	1	1	1	1	1	1	1	1	1	1
Centra3
P.maculatus						1	1	1	1	1	1	1	1	1	1	1	1	1	1	1	1	1
P.cruciger						1	1	1	1	1	1	1	1	1	1	1	1	1	1	1	1	1
T.eques			1	1	1	1	1	1	1	1	1	1	1	1	1	1	1	1	1	1	1	1
T.longinasus							1	1	1	1	1	1	1	1	1	1	1	1	1	1	1	1
centra 4
P.maculatus						1	1	1	1	1	1	1	1	1	1	1	1	1	1	1	1	1
P.cruciger						1	1	1	1	1	1	1	1	1	1	1	1	1	1	1	1	1
T.eques			1	1	1	1	1	1	1	1	1	1	1	1	1	1	1	1	1	1	1	1
T.longinasus							1	1	1	1	1	1	1	1	1	1	1	1	1	1	1	1
Centra5
P.maculatus								1	1	1	1	1	1	1	1	1	1	1	1	1	1	1
P.cruciger						1	1	1	1	1	1	1	1	1	1	1	1	1	1	1	1	1
T.eques			1	1	1	1	1	1	1	1	1	1	1	1	1	1	1	1	1	1	1	1
T.longinasus							1	1	1	1	1	1	1	1	1	1	1	1	1	1	1	1
Centra6
P.maculatus									1	1	1	1	1	1	1	1	1	1	1	1	1	1
P.cruciger						1	1	1	1	1	1	1	1	1	1	1	1	1	1	1	1	1
T.eques			1	1	1	1	1	1	1	1	1	1	1	1	1	1	1	1	1	1	1	1
T.longinasus										1	1	1	1	1	1	1	1	1	1	1	1	1
Centra7
P.maculatus										1	1	1	1	1	1	1	1	1	1	1	1	1
P.cruciger								1	1	1	1	1	1	1	1	1	1	1	1	1	1	1
T.eques			1	1	1	1	1	1	1	1	1	1	1	1	1	1	1	1	1	1	1	1
T.longinasus											1	1	1	1	1	1	1	1	1	1	1	1
Centra8
P.maculatus										1	1	1	1	1	1	1	1	1	1	1	1	1
P.cruciger										1	1	1	1	1	1	1	1	1	1	1	1	1
T.eques			1	1	1	1	1	1	1	1	1	1	1	1	1	1	1	1	1	1	1	1
T.longinasus											1	1	1	1	1	1	1	1	1	1	1	1
sacral
P.maculatus													1	1	1	1	1	1	1	1	1	1
P.cruciger											1	1	1	1	1	1	1	1	1	1	1	1
T.eques						1	1	1	1	1	1	1	1	1	1	1	1	1	1	1	1	1
T.longinasus												1	1	1	1	1	1	1	1	1	1	1
UROSTYLE
P.maculatus																1	1	1	1	1	1	1
P.cruciger																		1	1	1	1	1
T.eques										1	1	1	1	1	1	1	1	1	1	1	1	1
T.longinasus														1	1	1	1	1	1	1	1	1
Hypochord
P.maculatus																			1	1	1	1
P.cruciger																		1	1	1	1	1
T.eques															1	1	1	1	1	1	1	1
T.longinasus																1	1	1	1	1	1	1
sacral diapophysis
P.maculatus														1	1	1	1	1	1	1	1	1
P.cruciger																		1	1	1	1	1
T.eques																1	1	1	1	1	1	1
T.longinasus																1	1	1	1	1	1	1
