# Supplementary material for: Comparative Postembryonic Skeletal Ontogeny in Two Sister Lineages of Old World Tree Frogs (Rhacophoridae: Taruga, Polypedates)
Source: PLoS One. 2017 Jan 6;12(1):e0167939. doi: 10.1371/journal.pone.0167939 (PMC5218391; doi:10.1371/journal.pone.0167939)
Supplement: S9 Table — (XLSX) [file pone.0167939.s009.xlsx]

## Sheet: Sheet1
Fore limbs	25	26	27	28	29	30	31	32	33	34	35	36	37	38	39	40	41	42	43	44	45	46
Scapula
P.maculatus											1	1	1	1	1	1	1	1	1	1	1	1
P.cruciger												1	1	1	1	1	1	1	1	1	1	1
T.eques											1	1	1	1	1	1	1	1	1	1	1	1
T.longinasus											1	1	1	1	1	1	1	1	1	1	1	1
Humerus
P.maculatus											1	1
P.cruciger												1	1	1	1	1	1	1	1	1	1	1
T.eques											1	1	1	1	1	1	1	1	1	1	1	1
T.longinasus											1	1	1	1	1	1	1	1	1	1	1	1
Ulna
P.maculatus											1	1
P.cruciger												1	1	1	1	1	1	1	1	1	1	1
T.eques													1	1	1	1	1	1	1	1	1	1
T.longinasus											1	1	1	1	1	1	1	1	1	1	1	1
Radius
P.maculatus											1	1
P.cruciger												1	1	1	1	1	1	1	1	1	1	1
T.eques													1	1	1	1	1	1	1	1	1	1
T.longinasus											1	1	1	1	1	1	1	1	1	1	1	1
Cleithrum
P.maculatus												1	1
P.cruciger													1	1	1	1	1	1	1	1	1	1
T.eques														1	1	1	1	1	1	1	1	1
T.longinasus											1	1	1	1	1	1	1	1	1	1	1	1
Clavicle
P.maculatus														1	1	1	1	1	1	1	1	1
P.cruciger													1	1	1	1	1	1	1	1	1	1
T.eques														1	1	1	1	1	1	1	1	1
T.longinasus												1	1	1	1	1	1	1	1	1	1	1
Coracoid
P.maculatus														1	1	1	1	1	1	1	1	1
P.cruciger													1	1	1	1	1	1	1	1	1	1
T.eques														1	1	1	1	1	1	1	1	1
T.longinasus												1	1	1	1	1	1	1	1	1	1	1
Sternum
P.maculatus																						1
P.cruciger																					1	1
T.eques																						1
T.longinasus
Osmosternum
P.maculatus																						1
P.cruciger																					1	1
T.eques																						1
T.longinasus
Phalanges digits
P.maculatus														1	1	1	1	1	1	1	1	1
P.cruciger															1	1	1	1	1	1	1	1
T.eques														1	1	1	1	1	1	1	1	1
T.longinasus														1	1	1	1	1	1	1	1	1
metacarpals
P.maculatus														1	1	1	1	1	1	1	1	1
P.cruciger													1	1	1	1	1	1	1	1	1	1
T.eques													1	1	1	1	1	1	1	1	1	1
T.longinasus												1	1	1	1	1	1	1	1	1	1	1
carpals
P.maculatus																						1
P.cruciger
T.eques
T.longinasus
