# Supplementary material for: Comparative Postembryonic Skeletal Ontogeny in Two Sister Lineages of Old World Tree Frogs (Rhacophoridae: Taruga, Polypedates)
Source: PLoS One. 2017 Jan 6;12(1):e0167939. doi: 10.1371/journal.pone.0167939 (PMC5218391; doi:10.1371/journal.pone.0167939)
Supplement: S10 Table — (XLSX) [file pone.0167939.s010.xlsx]

## Sheet: Sheet1
	25	26	27	28	29	30	31	32	33	34	35	36	37	38	39	40	41	42	43	44	45	46
Femur
P.maculatus											1	1	1	1	1	1	1	1	1	1	1	1
P.cruciger												1	1	1	1	1	1	1	1	1	1	1
T.eques											1	1	1	1	1	1	1	1	1	1	1	1
T.longinasus													1	1	1	1	1	1	1	1	1	1
Ilium
P.maculatus											1	1
P.cruciger												1	1	1	1	1	1	1	1	1	1	1
T.eques											1	1	1	1	1	1	1	1	1	1	1	1
T.longinasus													1	1	1	1	1	1	1	1	1	1
Tibia
P.maculatus												1	1	1	1	1	1	1	1	1	1	1
P.cruciger													1	1	1	1	1	1	1	1	1	1
T.eques												1	1	1	1	1	1	1	1	1	1	1
T.longinasus													1	1	1	1	1	1	1	1	1	1
Fibula
P.maculatus												1	1	1	1	1	1	1	1	1	1	1
P.cruciger													1	1	1	1	1	1	1	1	1	1
T.eques												1	1	1	1	1	1	1	1	1	1	1
T.longinasus													1	1	1	1	1	1	1	1	1	1
Fibulare
P.maculatus													1	1	1	1	1	1	1	1	1	1
P.cruciger														1	1	1	1	1	1	1	1	1
T.eques													1	1	1	1	1	1	1	1	1	1
T.longinasus													1	1	1	1	1	1	1	1	1	1
Tibiale
P.maculatus													1	1	1	1	1	1	1	1	1	1
P.cruciger														1	1	1	1	1	1	1	1	1
T.eques													1	1	1	1	1	1	1	1	1	1
T.longinasus													1	1	1	1	1	1	1	1	1	1
Ischium
P.maculatus																			1	1	1	1
P.cruciger																		1	1	1	1	1
T.eques																				1	1	1
T.longinasus																			1	1	1	1
Metatarsalia
P.maculatus														1	1	1	1	1	1	1	1	1
P.cruciger														1	1	1	1	1	1	1	1	1
T.eques													1	1	1	1	1	1	1	1	1	1
T.longinasus														1	1	1	1	1	1	1	1	1
phalange digits
P.maculatus															1	1	1	1	1	1	1	1
P.cruciger															1	1	1	1	1	1	1	1
T.eques													1	1	1	1	1	1	1	1	1	1
T.longinasus																		1	1	1	1	1
tarsals
P.maculatus																						1
P.cruciger
T.eques
T.longinasus
