# Supplementary material for: Comparative Postembryonic Skeletal Ontogeny in Two Sister Lineages of Old World Tree Frogs (Rhacophoridae: Taruga, Polypedates)
Source: PLoS One. 2017 Jan 6;12(1):e0167939. doi: 10.1371/journal.pone.0167939 (PMC5218391; doi:10.1371/journal.pone.0167939)
Supplement: S11 Table — (XLSX) [file pone.0167939.s011.xlsx]

## Sheet: Sheet1
characters	P_cruci	P_macu	T_eques	T_longi	Chiromantis	Philautus	Mantella	Mantidactylus
0	0	0	0	1	1	1	0	?		0-8	character codes
1	3	3	3	3	1	1	3	?		?	indeterminate
2	1	1	1	1	1	1	1	1		-	inapplicable
3	0	0	0	0	0	0	0	0		A	polymorphic
4	1	1	1	1	0	1	0	?
5	0	0	0	0	0	1	1	?
6	0	0	0	0	0	0	1	1
7	0	0	0	0	0	0	0	0
8	1	1	1	1	1	1	?	0
9	?	?	?	?	1	1	1	2
10	1	1	1	1	1	1	1	1
11	1	1	1	1	1	1	1	1
12	0	0	0	0	0	0	1	?
13	1	1	1	1	1	1	1	?
14	1	1	1	1	1	2	1	2
15	0	0	0	0	0	0	0	?
16	0	0	0	0	0	0	1	0
17	1	1	1	1	3	2	1	3
18	1	1	1	1	1	1	?	1
19	0	0	0	0	0	0	0	1
20	1	1	1	1	0	1	0	0
21	1	1	1	1	1	1	1	1
22	1	1	1	1	1	1	1	1
23	2	2	2	2	2	2	2	2
24	0	0	0	0	0	0	0	0
25	1	1	1	1	1	1	1	1
26	0	0	0	0	0	0	0	0
27	0	0	0	0	0	0	0	0
28	2	2	2	2	2	2	2	2
29	1	1	0	0	1	0	1	1
30	1	1	1	1	1	1	1	1
31	2	2	2	2	2	2	1	1
32	6	1	1	1	6	1	1	6
33	0	0	0	0	0	0	0	0
34	1	1	1	1	1	1	1	0
35	0	0	0	0	0	0	1	1
36	0	0	0	0	0	0	0	0
37	0	0	0	0	0	0	0	0
38	0	0	0	0	0	0	1	1
39	2	2	2	2	0	0	0	1
40	1	1	1	1	0	1	?	1
41	0	0	0	0	0	0	?	0
42	0	0	0	0	0	0	1	0
43	-	-	-	-	0	0	-	0
44	0	0	0	0	0	0	1	?
45	0	0	0	0	0	0	1	0
46	1	1	0	0	3	3	?	1
47	1	1	1	1	1	1	0	1
48	0	0	0	0	0	0	0	0
49	1	1	1	1	1	1	0	1
50	0	0	0	0	0	0	0	0
51	0	0	0	0	0	0	0	0
52	0	0	0	0	0	1	0	1
53	1	1	1	1	1	?	1	1
54	0	0	0	0	0	0	0	0
55	1	1	1	1	1	1	0	0
56	0	0	0	0	2	0	0	2
57	0	0	0	0	0	0	1	0
58	1	1	1	1	1	1	0	1
59	0	0	2	2	2	0	?	0
60	0	0	0	0	0	0	1	0
61	0	0	0	0	0	0	0	0
62	0	1	1	1	0	1	0	1
63	0	0	0	0	0	0	0	0
64	2	2	2	2	2	2	0	0
65	0	0	0	0	0	0	0	0
66	0	0	0	0	0	0	0	0
67	0	0	0	0	0	0	0	0
68	0	0	0	0	0	0	0	0
69	2	2	2	2	2	2	2	2
70	0	0	0	0	0	0	1	1
71	0	0	0	0	1	0	0	0
72	1	1	1	1	1	1	0	1
73	2	2	2	2	2	2	2	1
74	0	0	0	0	0	0	2	0
75	0	0	0	0	0	0	0	0
76	0	0	0	0	0	0	0	0
77	1	1	1	1	1	0	?	1
78	0	0	0	0	0	0	2	0
79	0	0	0	0	0	0	1	1
80	0	0	0	0	0	0	?	?
81	0	0	0	0	0	0	0	0
82	0	0	0	0	0	0	0	0
83	4	4	4	4	1	0	?	1
84	0	0	0	0	0	0	?	0
85	0	0	0	0	0	0	?	1
86	0	0	0	0	0	0	?	1
87	0	0	0	0	0	0	?	0
88	0	0	0	0	1	1	?	1
89	0	0	0	0	0	0	?	0
90	0	0	0	0	0	0	0	0
91	1	1	0	0	0	0	?	0
92	0	0	0	0	0	0	?	0
93	0	0	0	0	0	0	0	0
94	1	1	1	1	1	1	?	1
95	0	0	0	0	0	1	0	0
96	0	0	0	0	0	0	0	0
97	0	0	0	0	0	0	1	1
98	0	0	0	0	0	0	0	0
99	?	?	?	?	0	0	?	0
100	?	?	?	?	0	0	?	0
101	?	?	?	?	0	0	?	0
102	0	0	0	0	3	3	3	3
103	0	0	0	0	0	0	1	?
104	3	3	3	3	3	3	3	3
105	0	0	0	0	0	0	?	0
106	0	0	0	0	0	0	0	0
107	0	0	0	0	0	0	2	0
108	0	0	0	0	0	0	0	0
109	0	0	0	0	0	0	0	0
110	?	?	?	?	1	0	0	1
111	0	0	0	0	0	0	0	0
112	0	0	0	0	0	0	0	0
113	0	0	0	0	0	0	0	0
114	1	1	1	1	0	1	1	1
115	1	1	1	1	1	1	0	0
116	0	0	0	0	0	0	0	0
117	2	2	2	2	2	2	2	2
118	0	0	0	0	0	0	0	0
119	4	4	4	4	4	4	4	4

## Sheet: Sheet2
120					0	1	0	1
121					-	0	-	0
122					-	0	-	0
123					-	0	-	0
124					-	0	-	0
125					0	0	1	1
126					1	1	1	1
127					0	0	0	0
128					0	0	0	1
129					0	0	0	0
130					0	0	2	2
131					0	?	?	0
132					2	1	0	0
133					0	0	0	0
134					0	0	0	0
135					2	2	2	2
136					0	0	0	0
137					1	1	0	?
138					0	0	-	?
139					0	0	0	0
140					0	0	1	1
141					2	2	2	2
142					0	0	0	0
143					0	0	1	0
144					0	0	0	0
145					0	0	0	0
146					1	1	1	1
147					0	0	2	0
148					0	0	0	0
149					0	0	0	0
150					0	0	0	0
151					0	0	0	0
152					0	0	0	0
153					0	0	1	0
154					0	0	0	0
155					0	0	1	0
156					0	0	0	0
157					0	0	0	0
158					0	0	0	0
159					0	0	0	1
160					?	?	1	1
161					0	0	0	0
162					2	2	?	0
163					1	1	0	0
164					0	0	0	0
165					2	2	0	1
166					0	1	0	0
167					0	0	0	0
168					0	0	0	0
169					0	0	0	0
170					0	0	1	0
171					0	0	1	1
172					0	0	0	0
173					0	0	0	0
174					1	1	3	3
175					0	1	0	0
176					0	-	0	0
177					0	0	0	0
